# Supplementary material
Source: PubMed Central journal article supplement (PMC3039342)

## Structural and Functional Comparison of the RING Domains of two p53 E3 ligases, Mdm2 and Pirh2

### Supplementary Material:

Table 1. The list of human E2s used in the *in vitro* ubiquitylation assays.

Figure 1. The MS analysis of p53 ubiquitylation by Pirh2 and Mdm2. In vitro reaction products were subjected to SDS-PAGE, and high MW products analyzed by LC-ESI-MS/MS. The ubiquitylation conjugation sites within p53 C-terminus in the reaction catalyzed by Pirh2. A. The numbers of observed spectra at the indicated sites. B. The observed peptides of each reaction components in the Pirh2 and Mdm2 catalyzed reactions. C. Average p53 coverage per MS analysis.

Figure 2. The *in vitro* ubiquitylation assays with a panel of representative E2s. A mixture of ATP, E1, His-Ub were reacted with a panel of E2s in the absence of an E3. An antibody against the His6-tag was used to detect polyubiquitylation. Cdc34 was found to autoubiquitylate in the absence of an E3, but does not support Pirh2 or Mdm2 mediated ubiquitylation as seen in supplementary figure 3 and 4. Asterisk represents the core domain of the respective E2.

Figure 3. Selection of E2s by Pirh2 and Mdm2. A mixture of ATP, E1, His-Ub and E3 (GST-Pirh2 or His-Mdm2) were reacted with a panel of E2s as indicated. Left panel: autoubiquitylation activity of Pirh2 was evaluated by blotting with an antibody against GST. Right panel, autoubiquitylation activity of Mdm2 was evaluated by blotting with an antibody against Mdm2.

Figure 4. Selection of E2 conjugating enzymes by Pirh2 and Mdm2 in mediating p53 ubiquitylation. P53 ubiquitylation mediated by Pirh2 (left) or Mdm2 (right) using a library of E2s as indicated. GST-Pirh2 (E3) and His-Mdm2 (E3) were subjected to *in vitro* ubiquitylation assay in the presence of ATP, E1, E2, His-tagged ubiquitin and p53 as indicated. After the reaction, the samples were resolved by SDS-PAGE and detected by western blot. Ubiquitylated p53 was detected using monoclonal antibody against p53 (PAB1801).

Figure 5. Chemical shift perturbation of Pirh2 RING domain upon binding to different E2s. (A) The residues with chemical shift changes of 0.05 ppm or greater induced upon binding to UBE2D2 are colored on the surface representation of Pirh2 RING domain. The most shifted residues from the first zinc binding sites I147, C148 are colored in yellow, the residues from the helix  $\alpha$ 1 T171, Y173, E174, M176 in magenta and the residues from the second zinc binding sites Y181, M185 and L187 in cyan. (B-F) Composite chemical shift changes versus residue number for Pirh2 RING domain (residue 138-189) upon binding to UBE2D2 (B), UBE2D3 (C), UBE2D1 (D), UBE2D4 (E) and UBE2E2 (F). The values shown were calculated by using the equation  $\Delta_{\text{comp}} = [\Delta\delta_{\text{HN}}^2 + (\Delta\delta_{\text{N}}/5)^2]^{1/2}$ .

Figure 6. The HSQC spectrum of Mdm2 417- 484 indicating that deletion of the C-terminal seven residues affects the Mdm2 RING domain structure.

| Protein Name | Synonyms                                                    | Gene Accession # |
|--------------|-------------------------------------------------------------|------------------|
| E2A          | UBC2, HHR6A, RAD6A                                          | NM_003336        |
| E2B          | UBC2, HR6B, HHR6B, RAD6B, E2-17K                            | NM_003337        |
| E2C          | UBCH10                                                      | NM_007019        |
| E2D1         | SFT, UBCH5, UBC4/5, UBCH5A, E2(17)KB1                       | NM_003338        |
| E2D2         | UBCH5B, UBC4                                                | NM_003339        |
| E2D3         | UBC4/5, UBCH5C, MGC5416, MGC43926, E2(17)KB3                | NM_003340        |
| E2D4         | HBUCE1                                                      | NM_015983        |
| E2E2         | UBCH8, FLJ25157                                             | NM_152653        |
| E2E3         | UBCH9, UBCM2                                                | NM_006357        |
| E2F          | NCE2                                                        | NM_080678        |
| E2G1         | UBE2G                                                       | NM_003342        |
| E2G2         | UBC7                                                        | NM_003343        |
| E2H          | UBC8, UBCH, UBCH2, E2-20K                                   | NM_003344        |
| E2I          | UBC9                                                        | NM_003345        |
| E2J1         | UBC6p, CGI-76, NCUBE1, HSPC153, HSPC205, HSU93243, MGC12555 | NM_016021        |
| E2J2         | NCUBE2, PRO2121                                             | NM_194315        |
| E2K          | HIP2, LIG, HYPG, UBE2K                                      | NM_005339        |
| E2L3         | E2-F1, L-UBC, UBCH7, UbcM4                                  | NM_198157        |
| E2L6         | RIG-B, UBCH8, MGC40331                                      | NM_004223        |
| E2M          | UBC12, hUbc12, UBC-RS2                                      | NM_003969        |
| E2N          | UBCH-BEN, UBC13, MGC8489                                    | NM_003348        |
| E2O          | E2-230K, FLJ12878, KIAA1734                                 | NM_022066        |
| E2Q1         | GTAP, UBE2Q, NICE-5, PRO3094                                | NM_017582        |
| E2Q2         |                                                             | NM_173469        |
| CDC34        | UBE2R1, E2-CDC34                                            | NM_004359        |
| E2R2         | UBC3B, CDC34B, FLJ20419, MGC10481                           | NM_017811        |
| E2S          | E2-EPF                                                      | NM_014501        |
| E2T          | PIG50, HSPC150                                              | NM_014176        |
| E2U          | MGC35130, RP4-636O23.1                                      | NM_152489        |
| E2V1         | CIR1, UEV1, CROC1, UBE2V, UEV-1, UEV1A, CROC-1              | NM_021988        |
| E2V2         | MMS2, UEV2, EDPF1, UEV-2, DDVIT1, EDAF-1, EDPF-1, DDVIT-1   | NM_003350        |
| E2W          | FLJ11011                                                    | NM_001001481     |
| E2Z          |                                                             | NM_023079        |
| TSG101       | TSG10, VPS23                                                | NM_006292        |
| FLJ25076     | UBE2Q like                                                  | XM_059689        |

**Supplementary Table 1:** The human E2s used in the *in vitro* ubiquitylation assays with Pirh2 and Mdm2 RING domain. For each entry, the Genbank nucleotide sequence accession number is provided to facilitate retrieval of E2 nucleotide sequence data.

Supplementary Figure 1

**A. p53 C-terminal conjugation sites (number of spectra observed)**

|              | <b>K370</b> | <b>K382</b> | <b>K386</b> |
|--------------|-------------|-------------|-------------|
| <b>Pirh2</b> | 4           | 10          | 53          |

**B. Peptide Totals (15 mass spectrometry runs each)**

|                  | <b>Pirh2</b> | <b>Mdm2</b> |
|------------------|--------------|-------------|
| <b>p53</b>       | 5889         | 5989        |
| <b>E1</b>        | 10357        | 11010       |
| <b>E2</b>        | 109          | 79          |
| <b>Mdm2</b>      | 9            | 7124        |
| <b>Pirh2</b>     | 1059         | 0           |
| <b>ubiquitin</b> | 4427         | 12005       |

**C. Average p53 coverage per analysis: 43.8%. Range 36-53%**

Supplementary Figure 2

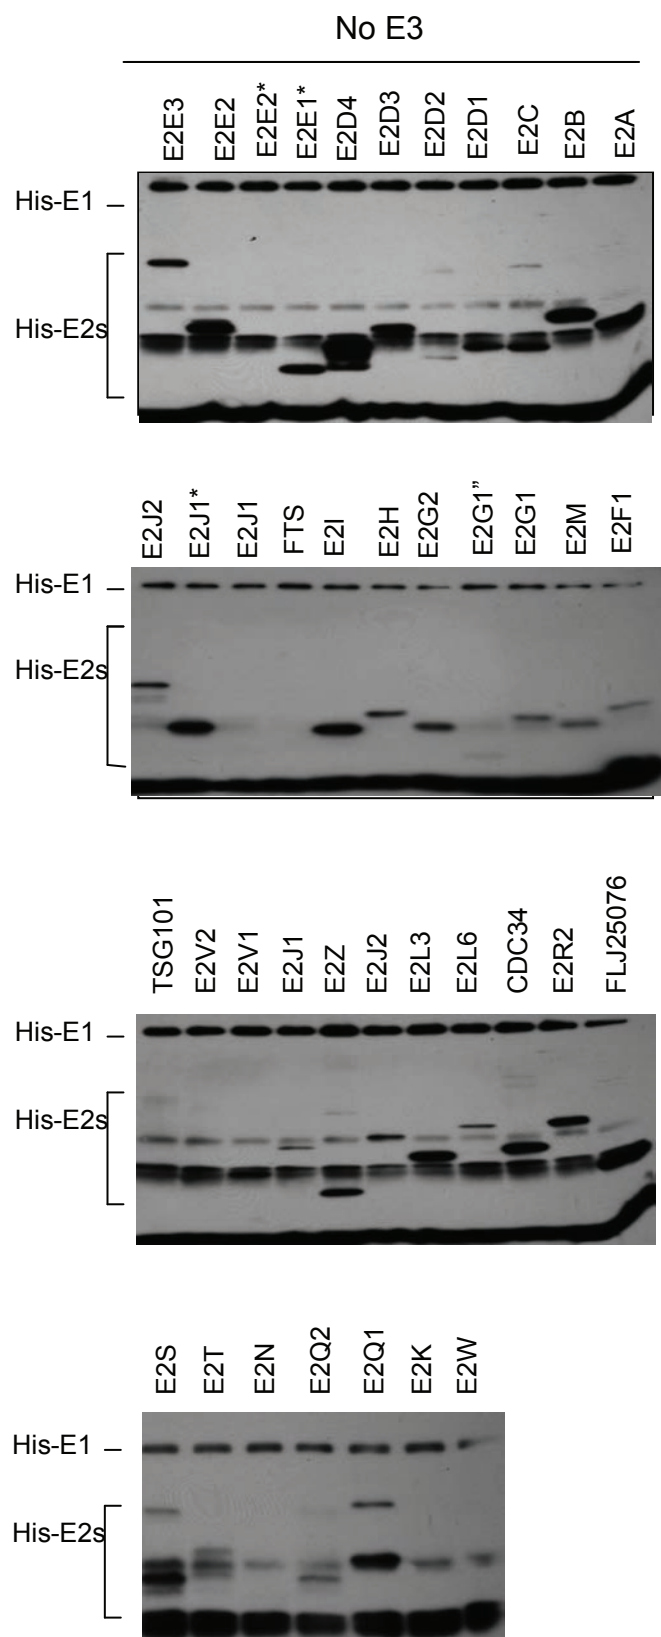

Supplementary Figure 3

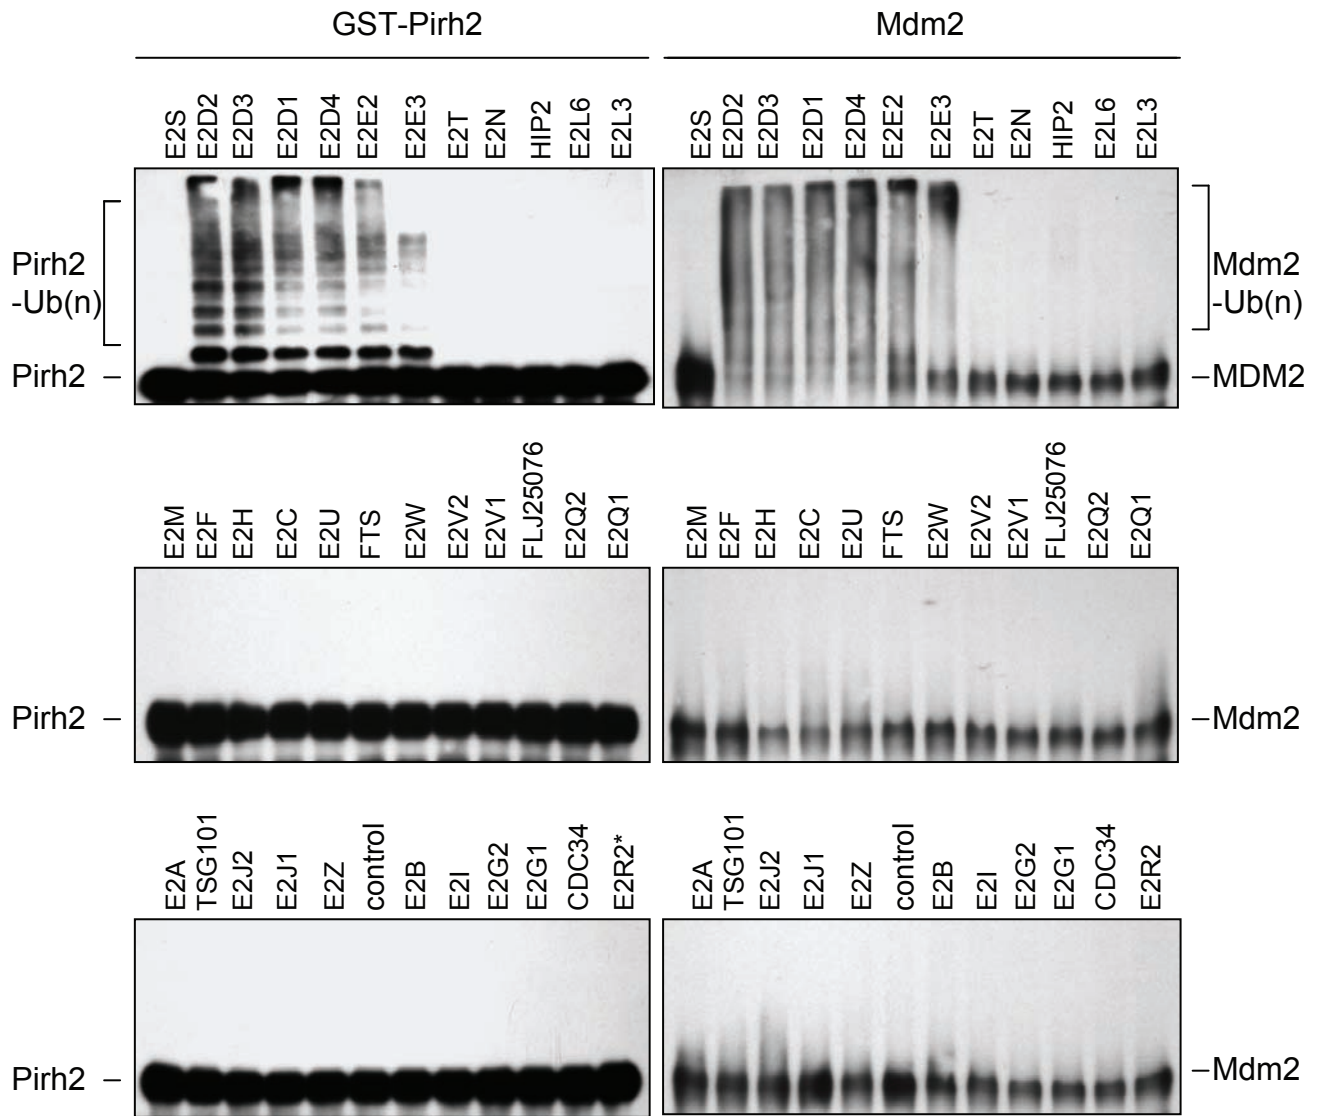

Supplementary Figure 4

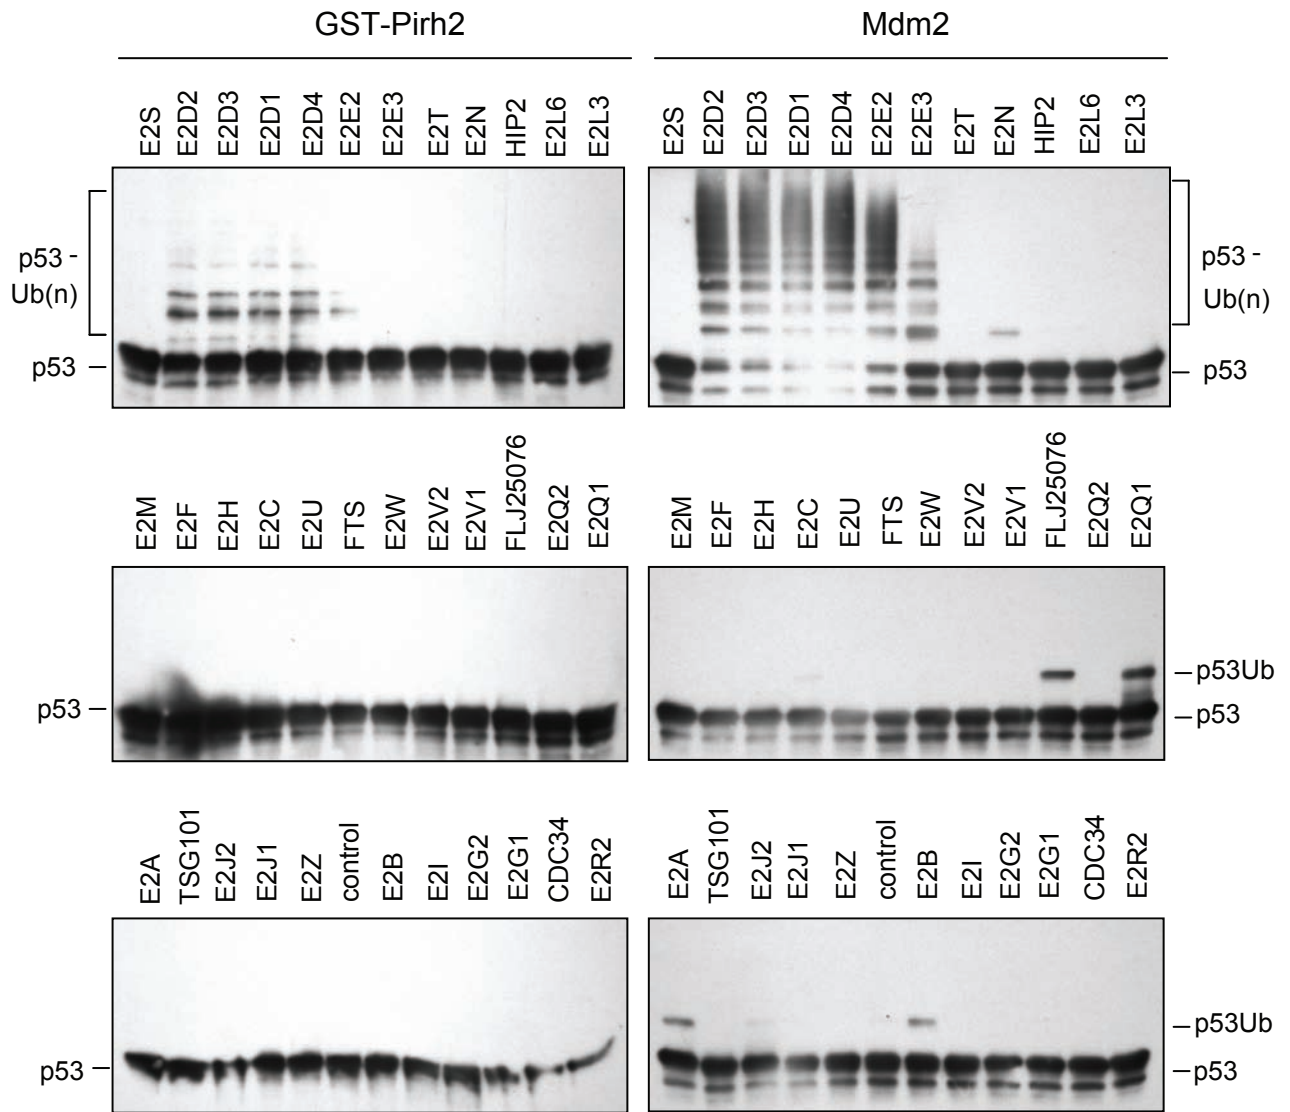

A

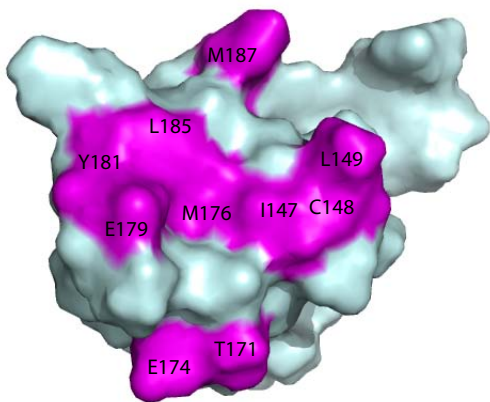

B

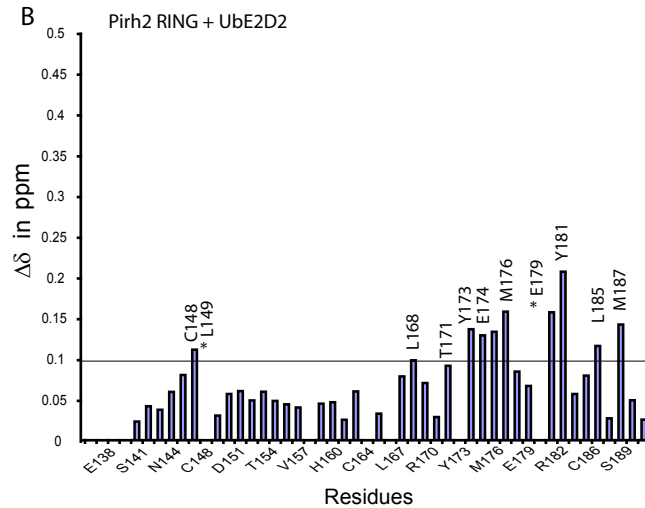

C

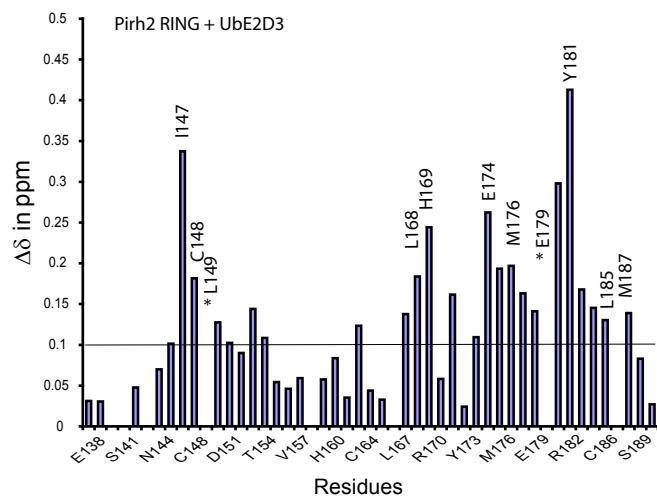

D

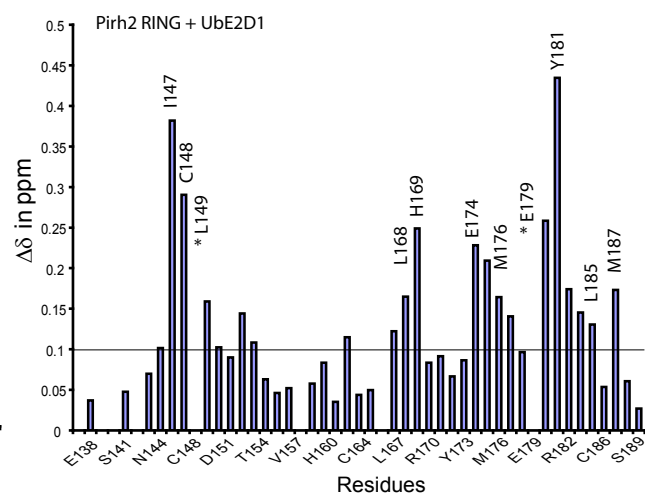

E

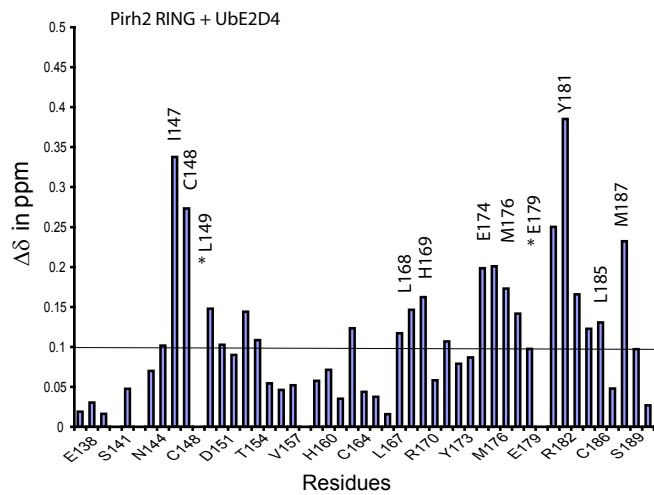

F

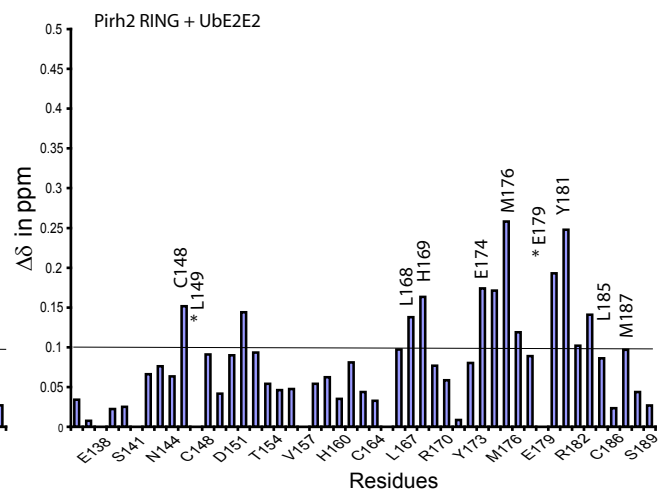

Supplementary Figure 6

HSQC of Mdm2 RING domain (Residues 417-484)

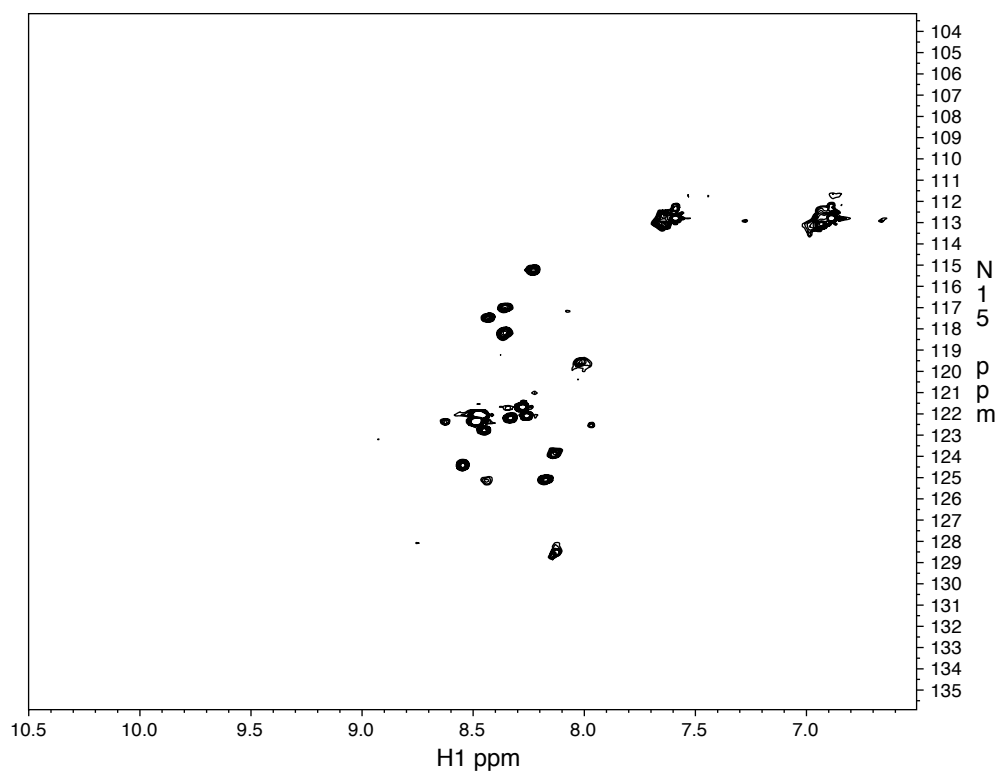

Supplement: supp_M110.157669_jbc.M110.157669-1.pdf [file supp_M110.157669_jbc.M110.157669-1.pdf]
